# Supplementary material for: ZnO nanoparticle–β-cyclodextrin: a recyclable heterogeneous catalyst for the synthesis of 3-aryl-4H-benzo[1,4]thiazin-2-amine in water
Source: Royal Society of Chemistry journal article supplement (doi:10.1039/c5nj03273c), 2016-01-01
Supplement: c5nj03273c1.pdf [file c5nj03273c1.pdf]

**Supplementary information**

**ZnO nanoparticle- $\beta$ -cyclodextrin: a recyclable heterogeneous catalyst for  
synthesis of 3-aryl-4H-benzo[1,4]thiazin-2-amine in water**

Hozeyfa Sagir<sup>a</sup>, Rahila<sup>a</sup>, Pragati Rai<sup>a</sup>, Prashant Kumar Singh<sup>b</sup> and I.R.Siddiqui<sup>\*a</sup>

*<sup>a</sup>Laboratory of Green Synthesis, Department of Chemistry, University of Allahabad, Allahabad-  
211002, India*

*<sup>b</sup>Nanotechnology Application Centre, University of Allahabad, Allahabad-211002, India*

\*Corresponding author

*E-mail address:* [dr.irsiddiqui@gmail.com](mailto:dr.irsiddiqui@gmail.com) ; Tel.: +91-9335153359

**Contents**

**Page No.**

|                                                                                     |     |
|-------------------------------------------------------------------------------------|-----|
| List of contents                                                                    | 2   |
| General Information, Experimental Procedures and Characterization Techniques Used   | 3-4 |
| <sup>1</sup> H NMR, <sup>13</sup> C NMR and Mass spectral data of compound <b>4</b> | 4-8 |

## **Experimental**

### **Material and methods**

All chemical were reagent grade purchased from Aldrich and Alfa Aesar and were used without purification. NMR spectra were recorded on a BRUKER AVANCE II-400FT Spectrometer (400 for <sup>1</sup>H NMR, 100 MHz for <sup>13</sup>C) using DMSO as solvent and TMS as an internal reference. ESI-MS were recorded on a Quattro II (ESI) spectrometer.

### **Synthesis of ZnO nanoparticles:**

25 mL, 1M solution of KOH was added dropwise to 50 mL of 0.05M solution of zinc acetate dihydrated by using dropping funnel for about 1h at 60°C under sonication. The sonication was carried out for another 1h. After centrifugation, mother liquor was removed and collected precipitate was washed with deionized water at least five times. The precipitate was then dried in air and characterized by TEM images, XRD and UV-vis. spectra techniques.

### **Characterization Techniques Used:**

The prepared nanoparticles of ZnO were thoroughly characterized by X-ray diffraction (XRD) and transmission electron microscopy (TEM) in order to elaborate structural properties in precise manner. XRD was performed on Rigaku D/max-2200 PC diffractometer operated at 40 kV/40 mA, using CuK $\alpha$ 1 radiation with wavelength of 1.54 Å in the wide angle region from 20° to 80° on 2 $\theta$  scale. The size and morphology of prepared nanoparticles were found using a transmission electron microscope (model Tecnai 30 G2S-Twin electron microscope) operated at 300 KV accelerating voltage by dissolving the as-synthesized powder sample in ethanol and then placing a drop of this dilute ethanolic solution on the surface of a carbon coated 200 mesh copper grid.

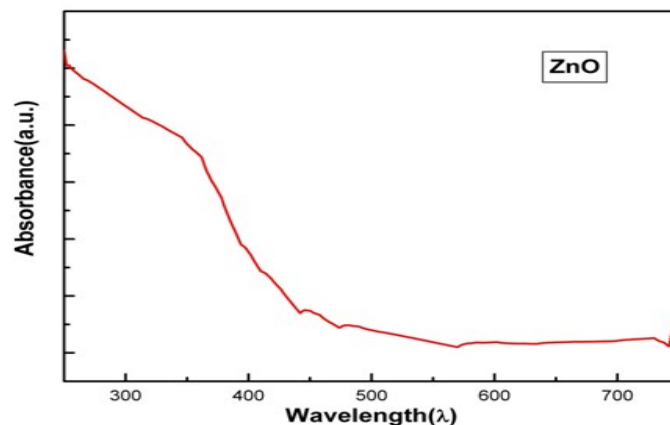

**Fig S1:** UV-Vis spectra of ZnO nanoparticles

To confirm the formation of nano sized ZnO under aqueous condition a UV-Vis study was also performed. The UV visible spectra for ZnO NP shows excitonic absorption peak at 361 nm which is blue shifted compared to bulk ZnO (due to the lower particle size of ZnO) indicate the formation of desired nanoparticles (**Fig. S1**).

**Typical Procedure for synthesis of N-Cyclohexyl-3-phenyl-4H-benzo[1,4]thiazin-2-amine (4a)**

A mixture of o-aminothiophenol **1** (1 mmol), benzaldehyde **3** (1 mmol), cyclohexylisocyanide **2** (1 mmol), nano ZnO (10 mol%) and  $\beta$ -cyclodextrin (2.5 mol%) in 5 mL of water was stirred at 60°C for 40 min. After completion of the reaction as indicated by TLC, the reaction mixture was cooled to room temperature and the product was precipitated by addition of 10 mL of H<sub>2</sub>O. Then the precipitated product was filtered off and washed with H<sub>2</sub>O. The residue was crystallized from EtOH to give the pure product.

## Spectra of all compounds 4a-4j

**(4a)N-Cyclohexyl-3-phenyl-4H-benzo[1,4]thiazin-2-amine:** Mp 193°C. IR (KBr, cm<sup>-1</sup>):  $\nu_{\max}$  = 3169, 3155. <sup>1</sup>H NMR (400 MHz, CDCl<sub>3</sub>):  $\delta$ (ppm) = 1.12–2.14 (m, 10H), 3.58 (m, 1H), 4.34 (s, 1H, NH), 4.67 (s, 1H, NH), 7.44–7.96 (m, 9H, ArH). <sup>13</sup>C NMR (100 MHz, CDCl<sub>3</sub>):  $\delta$  (ppm) = 23.2, 24.7 (2 CH<sub>2</sub>), 28.8 (2 CH<sub>2</sub>), 47.7, 121.1 (2 CH), 123.4, 123.9, 124.7, 126.9 (2 CH), 127.7, 130.1, 131.2, 136.1, 137.9, 138.8, 140.3. MS: m/z = 322 [M<sup>+</sup>]; Analysis Calcd for C<sub>20</sub>H<sub>22</sub>N<sub>2</sub>S: C, 74.49; H, 6.88; N, 8.69(%) Found: C, 73.94; H, 6.39; N, 8.57%.

**(4b)N-Cyclohexyl-3-(4-chlorophenyl)-4H-benzo[1,4]thiazin-2- amine:** Mp 204°C. IR (KBr, cm<sup>-1</sup>):  $\nu_{\max}$ : = 3189, 3163. <sup>1</sup>H NMR (400 MHz, CDCl<sub>3</sub>):  $\delta$  (ppm) = 1.24–2.27 (m, 10 H), 3.44 (m, 1 H), 4.37 (s, 1 H, NH), 4.68 (s, 1 H, NH), 7.40–8.28 (m, 8 H, ArH). <sup>13</sup>C NMR (100 MHz, CDCl<sub>3</sub>):  $\delta$  (ppm) = 22.3, 26.4 (2 CH<sub>2</sub>), 33.6 (2 CH<sub>2</sub>), 49.1, 121.8 (2 CH), 123.5, 124.1 (2 CH), 127.1, 129.6, 130.3, 131.5, 138.4, 140.2, 142.3, 147.8, 149.9 (CCl). MS: m/z = 356 [M<sup>+</sup>]. Analysis Calcd (%) for C<sub>20</sub>H<sub>21</sub>N<sub>2</sub>SCl: C, 67.30; H, 5.93; N, 7.85. Found: C, 67.13; H, 5.65; N, 7.93.

**(4c)N-Cyclohexyl-3-(4-methoxyphenyl)-4H-benzo[1,4]thiazin -2- amine:** Mp 188°C. IR (KBr, cm<sup>-1</sup>):  $\nu_{\max}$  = 3162, 3149. <sup>1</sup>H NMR (400 MHz, CDCl<sub>3</sub>):  $\delta$  (ppm) = 1.16–2.24 (m, 10 H), 2.98 (s, 3H) 3.34 (m, 1 H), 4.23 (s, 1 H, NH), 4.54 (s, 1 H, NH), 7.28–8.11 (m, 8 H, ArH). <sup>13</sup>C NMR (100 MHz, CDCl<sub>3</sub>):  $\delta$  (ppm) = 23.1, 24.1 (2CH<sub>2</sub>), 26.5 (2CH<sub>2</sub>), 49.9, 121.1 (2CH), 122.5, 123.8 (2CH), 125.1, 127.2, 130.9, 132.3, 136.7, 139.1, 142.9, 147.8, 149.2 ppm. MS: m/z = 352 [M<sup>+</sup>]. Analysis Calcd (%) for C<sub>21</sub>H<sub>24</sub>N<sub>2</sub>SO: C, 71.55; H, 6.86; N, 7.95. Found: C, 70.81; H, 6.24; N, 7.25.

**(4d)N-Cyclohexyl-3-(4-nitrophenyl)-4H-benzo[1,4]thiazin-2-amine:** Mp 209°C. IR (KBr, cm<sup>-1</sup>):  $\nu_{\max}$  = 3176, 3152. <sup>1</sup>H NMR (400 MHz, CDCl<sub>3</sub>):  $\delta$  (ppm) = 1.14–2.36 (m, 10 H), 3.53 (m, 1 H), 4.37 (s, 1 H, NH), 4.73 (s, 1 H, NH), 7.44–8.37 (m, 8 H, arom). <sup>13</sup>C NMR (125 MHz, CDCl<sub>3</sub>):

$\delta$  (ppm) = 23.4, 24.3 (2 CH<sub>2</sub>), 26.2 (2 CH<sub>2</sub>), 48.6, 121.9 (2 CH), 123.7, 125.3 (2 CH), 126.2, 128.0, 131.3, 137.4, 139.5, 141.6, 142.1, 146.9, 150.2 (CNO<sub>2</sub>). MS:  $m/z$  = 367 [M<sup>+</sup>]. Analysis Calcd (%) for C<sub>20</sub>H<sub>21</sub>N<sub>3</sub>SO<sub>2</sub>: C, 65.37; H, 5.76; N, 11.43. Found: C, 65.20; H, 5.79; N, 11.35.

**(4e)N-Cyclohexyl-3-(4-methylphenyl)-4H-benzo[1,4]thiazin-2- amine:** Mp 207°C. IR (KBr,cm-1):  $\nu_{\max}$  = 3167, 3153. <sup>1</sup>H NMR (400 MHz, CDCl<sub>3</sub>):  $\delta$  (ppm) = 1.14–2.26 (m, 10 H), 2.42 (s, 3 H), 3.67 (m, 1 H), 4.45 (s, 1 H, NH), 4.76 (s, 1 H, NH), 7.27–8.04 (m, 8 H, arom). <sup>13</sup>C NMR (100 MHz, CDCl<sub>3</sub>):  $\delta$  (ppm) = 23.1, 24.1 (2 CH<sub>2</sub>), 27.1 (2 CH<sub>2</sub>), 40.8, 53.5, 124.6 (2 CH), 122.5, 125.4 (2 CH), 127.1, 128.7, 129.2, 137.1, 138.5, 140.6, 141.0, 143.9, 149.9. MS:  $m/z$  = 336 [M<sup>+</sup>]. Analysis Calcd (%) for C<sub>21</sub>H<sub>24</sub>N<sub>2</sub>S: C, 74.96; H, 7.19; N, 8.32. Found: C, 79.80; H, 7.24; N, 8.25.

**(4f)N-tert-Butyl-3-(4-methoxyphenyl)-4H-benzo[1,4]thiazin-2-amine:** Mp 228°C. IR (KBr, cm-1):  $\nu_{\max}$ =3159, 3147. <sup>1</sup>H NMR (400 MHz, CDCl<sub>3</sub>):  $\delta$  (ppm) 1.28 (s, 9H), 3.36 (s, 3H, OCH<sub>3</sub>), 4.21 (s, 1H, NH), 4.56 (s, 1 H, NH),7.17–8.04 (m, 8 H, arom).<sup>13</sup>C NMR (125 MHz, CDCl<sub>3</sub>):  $\delta$ (ppm) = 23.2 (3CH<sub>3</sub>), 41.1, 121.1 (2CH), 122.2, 123.6 (2CH), 124.9, 125.1, 131.0, 131.9, 133.2, 138.9, 142.5, 148.4, 149.0. MS:  $m/z$  = 326 [M<sup>+</sup>]. Analysis Calcd (%) for C<sub>19</sub>H<sub>22</sub>N<sub>2</sub>SO: C, 69.90; H, 6.79; N, 8.58. Found: C, 69.88; H, 6.09; N, 8.45.

**(4g)N-Cyclohexyl-3-(4-hydroxyphenyl)-4H-benzo[1,4]thiazin 2- amine:** Mp 186°C. IR (KBr, cm-1):  $\nu_{\max}$  = 3161, 3145. <sup>1</sup>H NMR (400 MHz, CDCl<sub>3</sub>):  $\delta$  (ppm) = 1.14–2.25 (m, 10 H), 3.38 (m, 1 H), 4.24 (s, 1 H, NH), 4.66 (s, 1 H, NH), 4.91 (s, 1 H, OH), 7.32–8.07 (m, 8 H, arom). <sup>13</sup>C NMR (100 MHz, CDCl<sub>3</sub>):  $\delta$  (ppm) = 23.4, 24.8 (2 CH<sub>2</sub>), 26.7 (2 CH<sub>2</sub>), 52.1, 121.1 (2 CH), 123.3, 124.3 (2 CH), 125.2, 130.9, 131.4, 133.5, 137.1, 139.1, 143.0, 148.8, 149.2. MS:  $m/z$  = 338 [M<sup>+</sup>]. Analysis Calcd (%) for C<sub>20</sub>H<sub>22</sub>N<sub>2</sub>SO: C, 70.97; H, 6.56; N, 8.28. Found: C, 70.83; H, 6.31; N, 8.13.

**(4h)N-tert-Butyl-3-phenyl-4H-benzo[1,4]thiazin-2-amine** Mp 233°C. IR (KBr,cm-1):  $\nu_{\max}$ = 3154, 3141 cm<sup>-1</sup>. <sup>1</sup>H NMR (400 MHz, CDCl<sub>3</sub>):  $\delta$  (ppm) = 1.34 (s, 9 H), 4.16 (s, 1 H, NH), 4.66 (s, 1 H, NH), 7.24– 7.95 (m, 9 H, arom). <sup>13</sup>C NMR (100 MHz, CDCl<sub>3</sub>):  $\delta$  (ppm) = 26.3 (3 CH<sub>3</sub>), 40.4, 122.5 (2 CH), 124.6, 124.8, 125.4, 126.8 (2 CH), 128.7, 131.7, 132.8, 136.8, 137.6, 138.9, 141.5. MS: m/z = 296 [M<sup>+</sup>]. Analysis Calcd (%) for C<sub>18</sub>H<sub>20</sub>N<sub>2</sub>S: C, 72.93; H, 6.80; N, 9.45. Found: C, 72.86; H, 6.60; N, 9.36.

**(4i)N-tert-Butyl-3-(4-nitrophenyl)-4H-benzo[1,4]thiazin-2-amine:** Mp-210°C. IR (KBr, cm-1):  $\nu_{\max}$  = 3172, 3158. <sup>1</sup>H NMR (400 MHz, CDCl<sub>3</sub>):  $\delta$  (ppm) 1.34 (s, 9H), 4.28 (s, 1H, NH), 4.78 (s, 1H, NH), 7.32–8.42 (m, 8 H, arom). <sup>13</sup>C NMR (125 MHz, CDCl<sub>3</sub>):  $\delta$  (ppm) = 28.6 (3CH<sub>3</sub>), 48.9, 121.5(2 CH), 123.7, 124.98(2 CH), 126.7, 128.1, 131.3, 134.4, 138.5, 141.7, 142.2, 147.0, 149.9. MS: m/z = 341 [M<sup>+</sup>]. Analysis Calcd (%) for C<sub>18</sub>H<sub>19</sub>N<sub>3</sub>O<sub>2</sub>S: C, 63.32; H, 5.61; N, 12.31. Found: C, 63.46; H, 5.72; N, 12.39.

**(4j)N-Cyclohexyl-6-methyl-3-phenyl-4H-benzo[1,4]thiazin-2- amine:** Mp 242°C. IR (KBr,cm-1):  $\nu_{\max}$  = 3166, 3158 cm<sup>-1</sup>. <sup>1</sup>H NMR (400 MHz, CDCl<sub>3</sub>)  $\delta$  (ppm) = 1.12–2.24 (m, 10 H), 3.05 (s, 3 H), 3.66 (m, 1 H), 4.62(s, 1 H, NH), 4.96 (s, 1 H, NH), 7.25–7.91 (m, 8 H, arom). <sup>13</sup>C NMR (100 MHz, CDCl<sub>3</sub>):  $\delta$  (ppm) = 24.1, 24.4 (2 CH<sub>2</sub>), 28.8 (2 CH<sub>2</sub>), 30.9, 47.9, 121.9 (2 CH), 124.4, 124.7, 125.3, 126.8 (2 CH), 127.1, 130.8, 131.4, 136.5, 137.9, 138.4, 140.9 ppm. MS: m/z = 336 [M<sup>+</sup>]. Analysis Calcd (%) for C<sub>21</sub>H<sub>24</sub>N<sub>2</sub>S: C, 74.96; H, 7.19; N, 8.32. Found: C, 74.87; H, 7.05; N, 8.23.
